# Supplementary material for: Downregulation of the Coiled-Coil Domain Containing 80 and Its Perspective Mechanisms in Ovarian Carcinoma: A Comprehensive Study
Source: Hindawi journal article supplement (doi:10.1155/2021/3752871), 2021-11-15
Supplement: f1 [file 3752871.f1.pdf]

**Table S1.** Kyoto Encyclopedia of Genes and Genomes analysis of the intersection of *CCDC80* related co-expressed genes and differentially expressed genes.

| Gene                                       | ID                                           | Description                                     | adjusted <i>p</i> -value | Count    |
|--------------------------------------------|----------------------------------------------|-------------------------------------------------|--------------------------|----------|
| CCDC80 positively related upregulated DEGs | hsa05412                                     | Arrhythmogenic right ventricular cardiomyopathy | 0.01917                  | 3        |
|                                            | hsa00630                                     | Glyoxylate and dicarboxylate metabolism         | 0.020539                 | 2        |
|                                            | hsa00512                                     | Mucin type O-glycan biosynthesis                | 0.023199                 | 2        |
|                                            | hsa03410                                     | Base excision repair                            | 0.02458                  | 2        |
|                                            | hsa03030                                     | DNA replication                                 | 0.028917                 | 2        |
|                                            | hsa05216                                     | Thyroid cancer                                  | 0.030426                 | 2        |
|                                            | hsa05340                                     | Primary immunodeficiency                        | 0.031966                 | 2        |
|                                            | hsa00564                                     | Glycerophospholipid metabolism                  | 0.035759                 | 3        |
|                                            | hsa04530                                     | Tight junction                                  | 0.036096                 | 4        |
|                                            | CCDC80 negatively related downregulated DEGs | hsa04014                                        | Ras signaling pathway    | 0.000842 |
| hsa04360                                   |                                              | Axon guidance                                   | 0.001457                 | 10       |
| hsa04371                                   |                                              | Apelin signaling pathway                        | 0.002979                 | 8        |
| hsa00760                                   |                                              | Nicotinate and nicotinamide metabolism          | 0.003266                 | 4        |
| hsa05205                                   |                                              | Proteoglycans in cancer                         | 0.003488                 | 10       |
| hsa04072                                   |                                              | Phospholipase D signaling pathway               | 0.004771                 | 8        |
| hsa05032                                   |                                              | Morphine addiction                              | 0.005488                 | 6        |
| hsa00830                                   |                                              | Retinol metabolism                              | 0.007029                 | 5        |
| hsa04926                                   |                                              | Relaxin signaling pathway                       | 0.007985                 | 7        |
| hsa04510                                   |                                              | Focal adhesion                                  | 0.009477                 | 9        |
| hsa04022                                   |                                              | cGMP-PKG signaling pathway                      | 0.009684                 | 8        |
| hsa04151                                   |                                              | PI3K-Akt signaling pathway                      | 0.010137                 | 13       |

---

|          |                                                          |          |    |
|----------|----------------------------------------------------------|----------|----|
| hsa05418 | Fluid shear stress and atherosclerosis                   | 0.011782 | 7  |
| hsa04550 | Signaling pathways regulating pluripotency of stem cells | 0.013617 | 7  |
| hsa04010 | MAPK signaling pathway                                   | 0.015449 | 11 |
| hsa04724 | Glutamatergic synapse                                    | 0.015783 | 6  |
| hsa05226 | Gastric cancer                                           | 0.016743 | 7  |
| hsa04923 | Regulation of lipolysis in adipocytes                    | 0.018262 | 4  |
| hsa05217 | Basal cell carcinoma                                     | 0.025394 | 4  |
| hsa00350 | Tyrosine metabolism                                      | 0.025596 | 3  |
| hsa04350 | TGF-beta signaling pathway                               | 0.025714 | 5  |
| hsa04020 | Calcium signaling pathway                                | 0.027033 | 9  |
| hsa00250 | Alanine, aspartate and glutamate metabolism              | 0.027501 | 3  |
| hsa04068 | FoxO signaling pathway                                   | 0.029023 | 6  |
| hsa04933 | AGE-RAGE signaling pathway in diabetic complications     | 0.032445 | 5  |
| hsa04015 | Rap1 signaling pathway                                   | 0.033377 | 8  |
| hsa04924 | Renin secretion                                          | 0.033997 | 4  |
| hsa04910 | Insulin signaling pathway                                | 0.035049 | 6  |
| hsa04080 | Neuroactive ligand-receptor interaction                  | 0.040131 | 11 |
| hsa04931 | Insulin resistance                                       | 0.042996 | 5  |
| hsa02010 | ABC transporters                                         | 0.045362 | 3  |

---

DEGs: differentially expressed genes

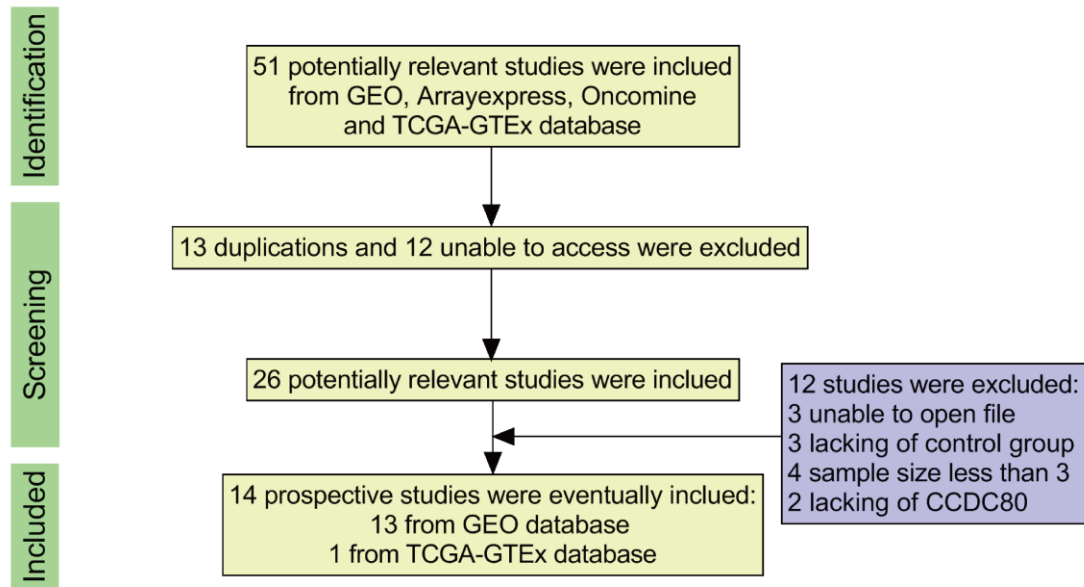

**Figure S1.** The flow chart of screening OVCA-related datasets for this study

A

Positive Correlated Genes

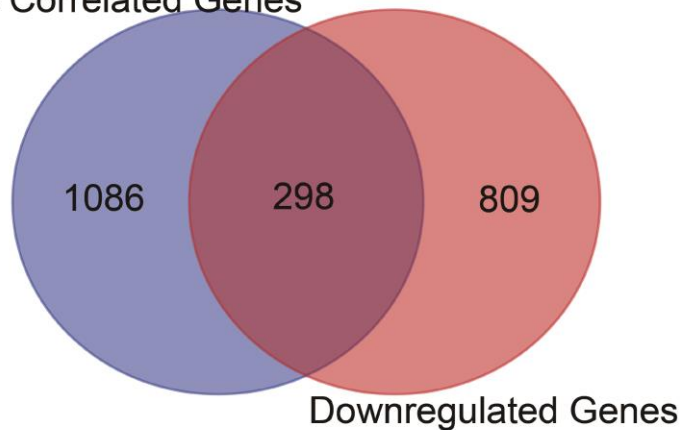

B

Negative Correlated Genes

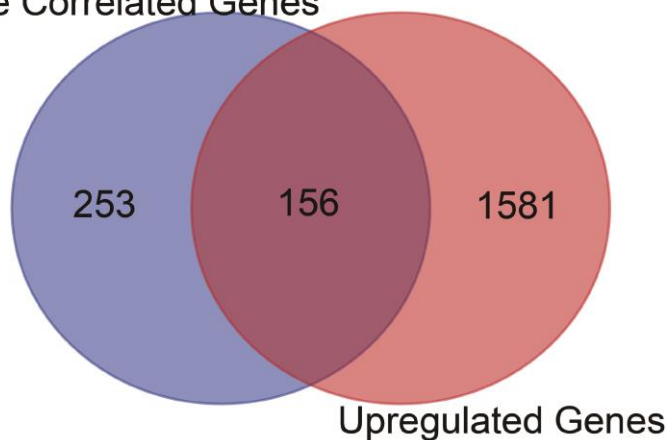

**Figure S2.** Venn diagrams for the intersection genes consists of *CCDC80* positively related CEGs and downregulated DEGs (A), and intersection genes consists of

*CCDC80* negatively related CEGs and upregulated DEGs (B)

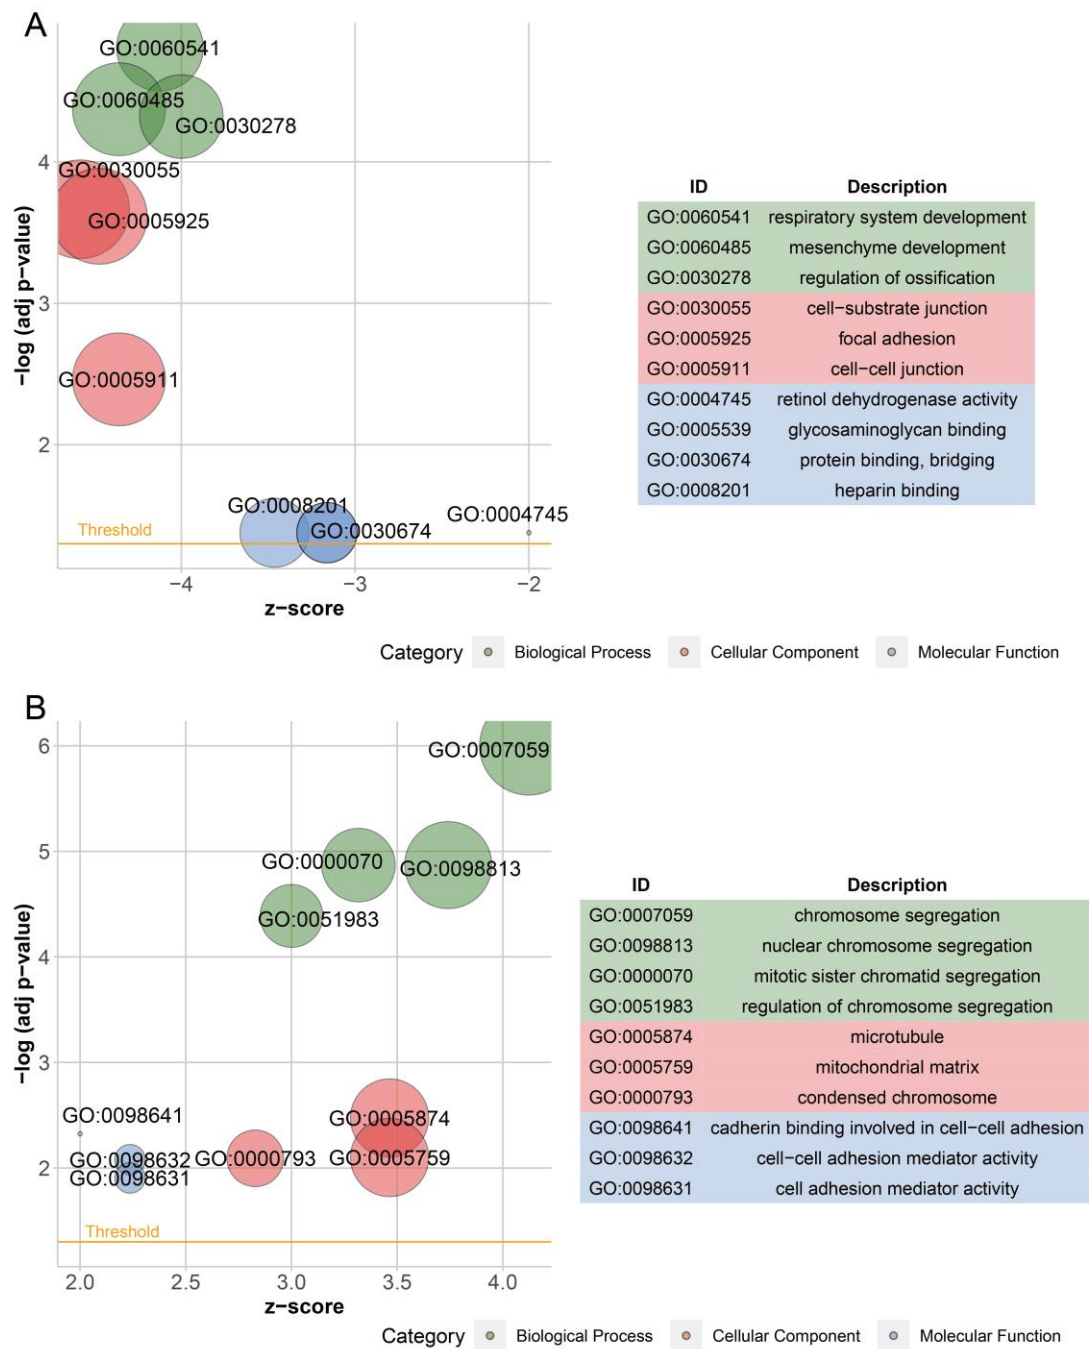

**Figure S3.** Bubble plots of GO annotation analysis based on intersection genes from *CCDC80* positively related CEGs and downregulated DEGs (A), and *CCDC80* negatively related CEGs and upregulated DEGs (B)

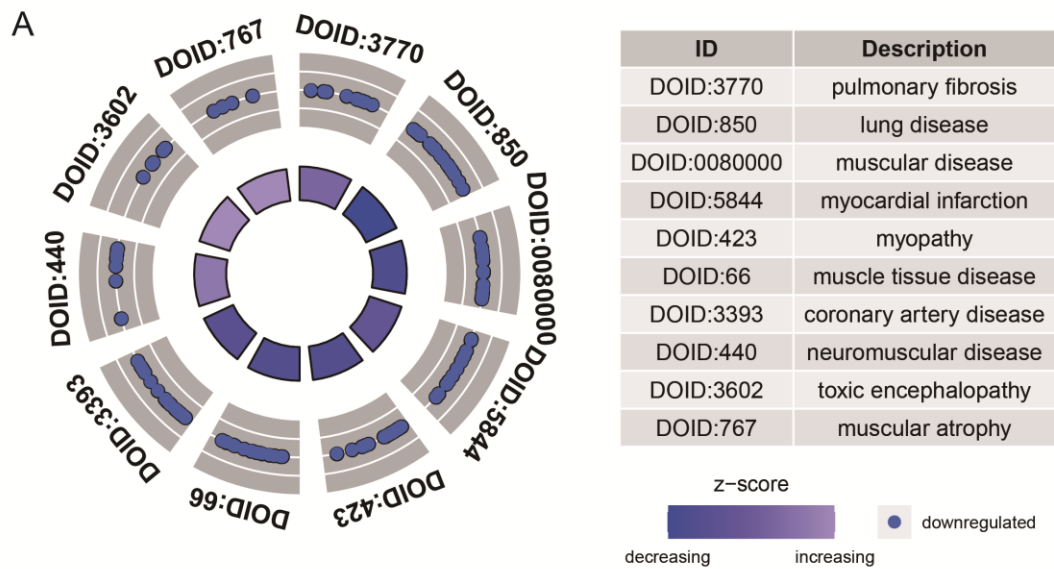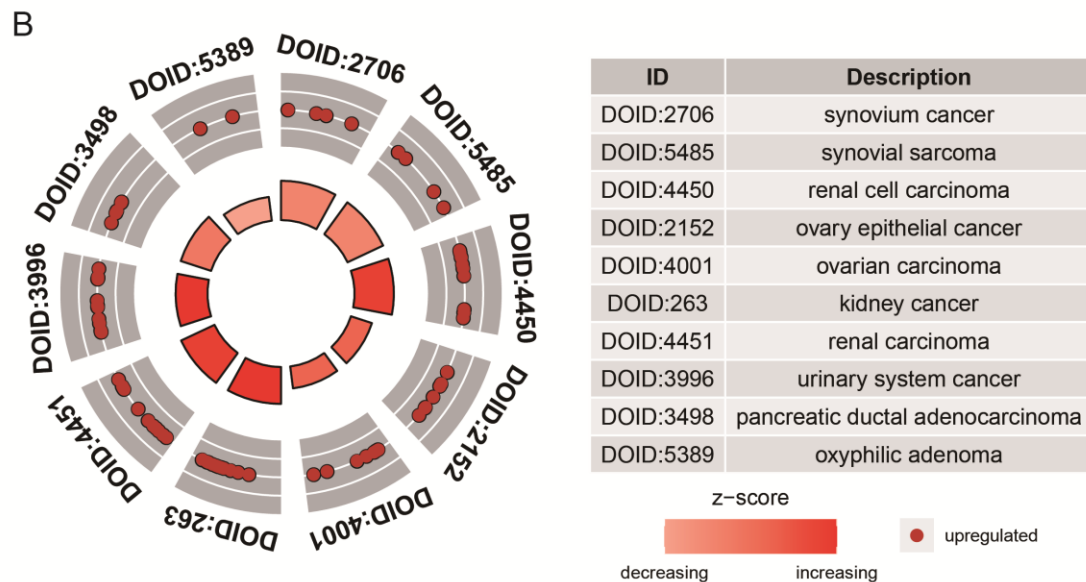

**Figure S4.** Circle plots of DO annotation analysis based on intersection genes from *CCDC80* positively related CEGs and downregulated DEGs (A), and *CCDC80* negatively related CEGs and upregulated DEGs (B)

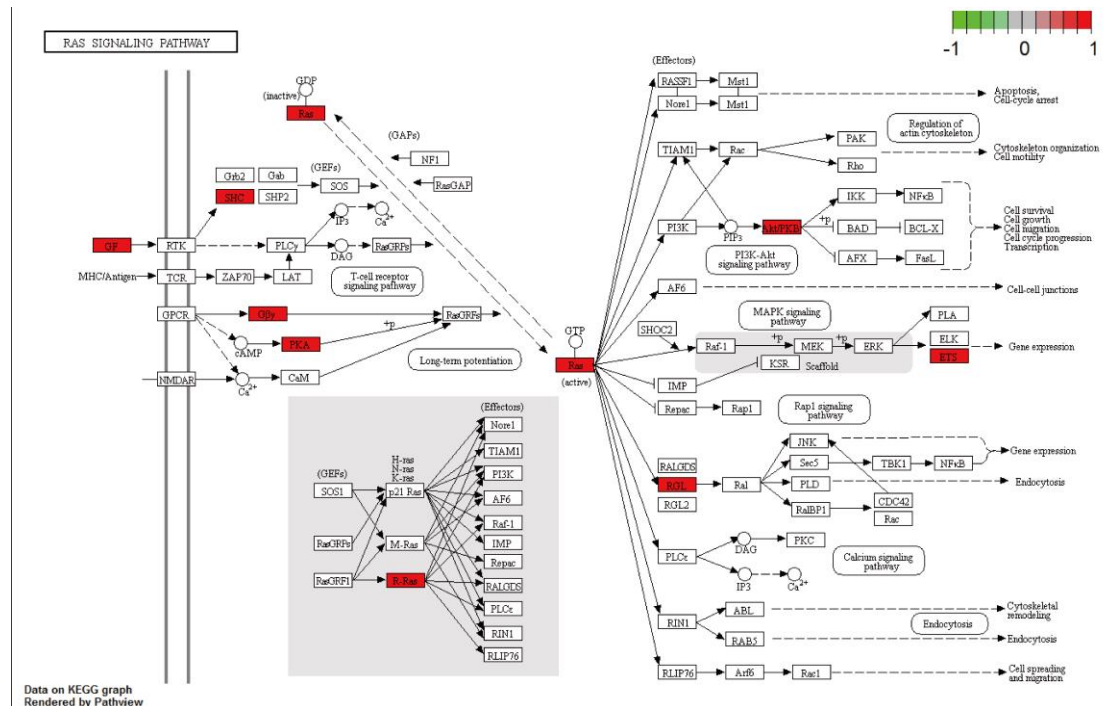

**Figure S5.** Visualization of Ras signaling pathway

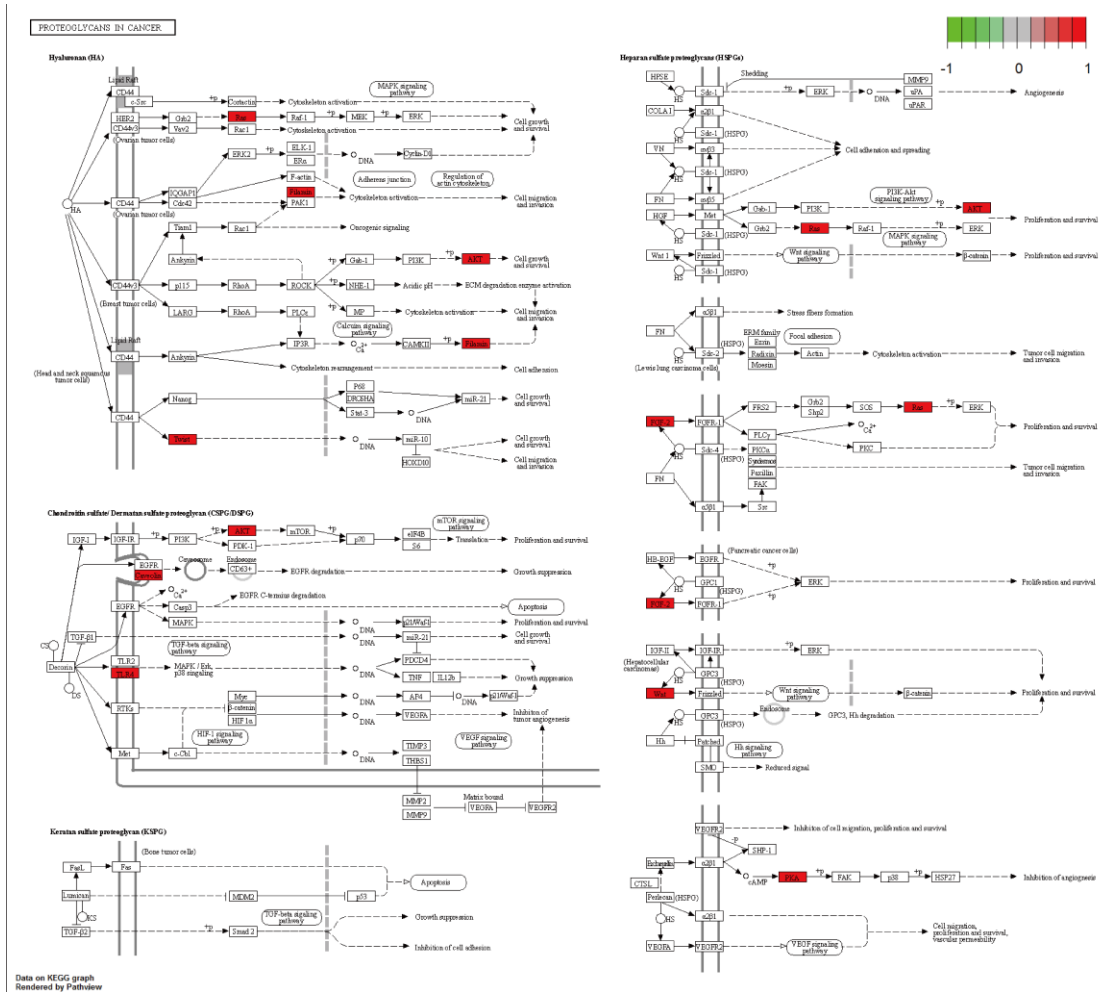

**Figure S6.** Visualization of proteoglycans in cancer pathway

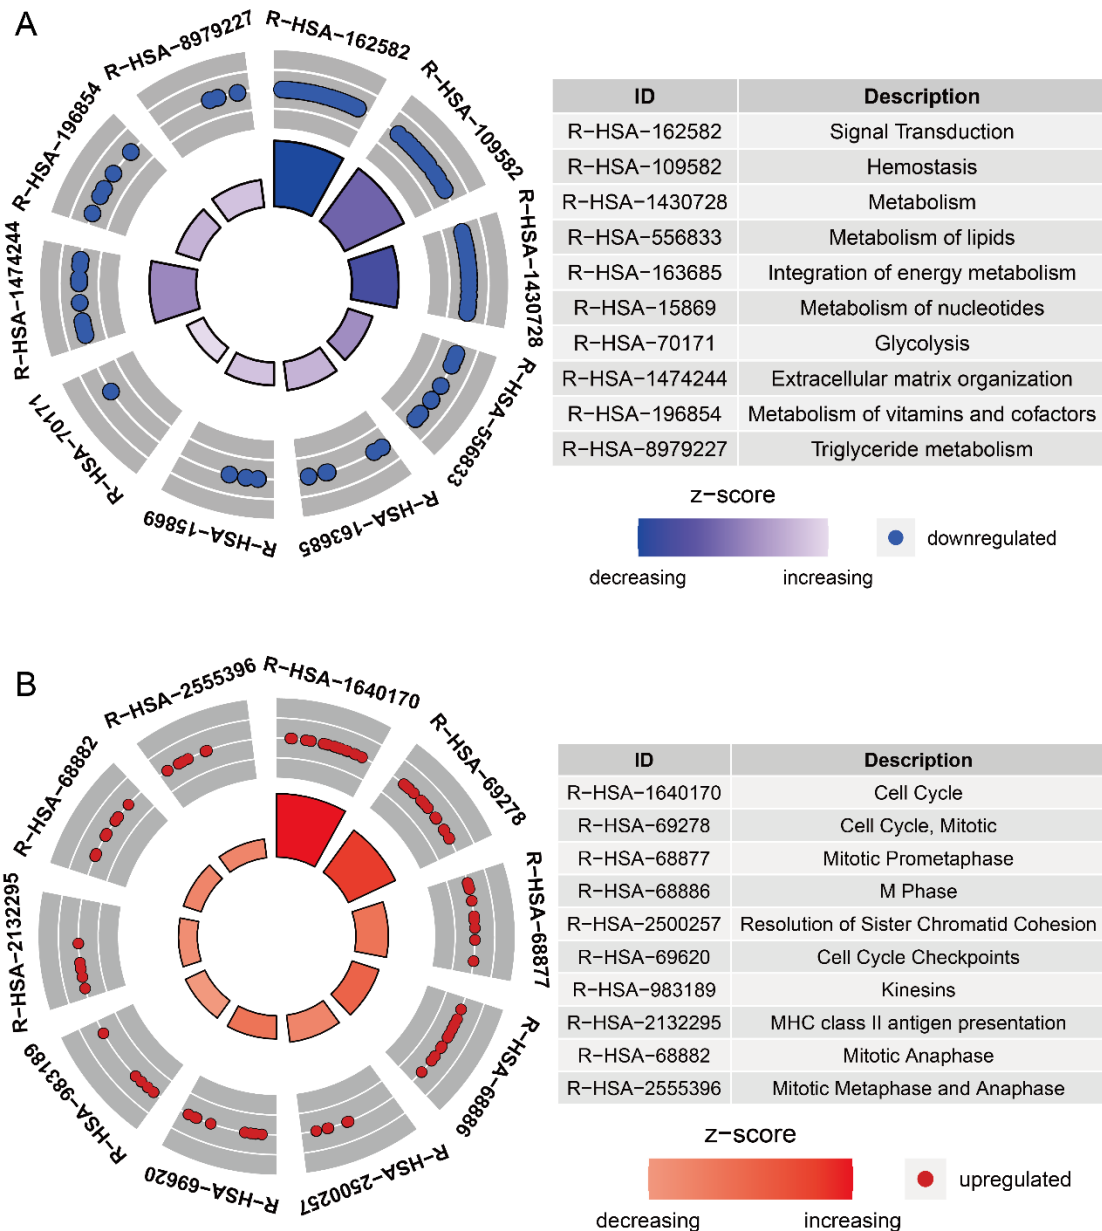

**Figure S7.** Circle plots of Reactome pathway analysis based on intersection genes from *CCDC80* positively related CEGs and downregulated DEGs (A), and *CCDC80* negatively related CEGs and upregulated DEGs (B)



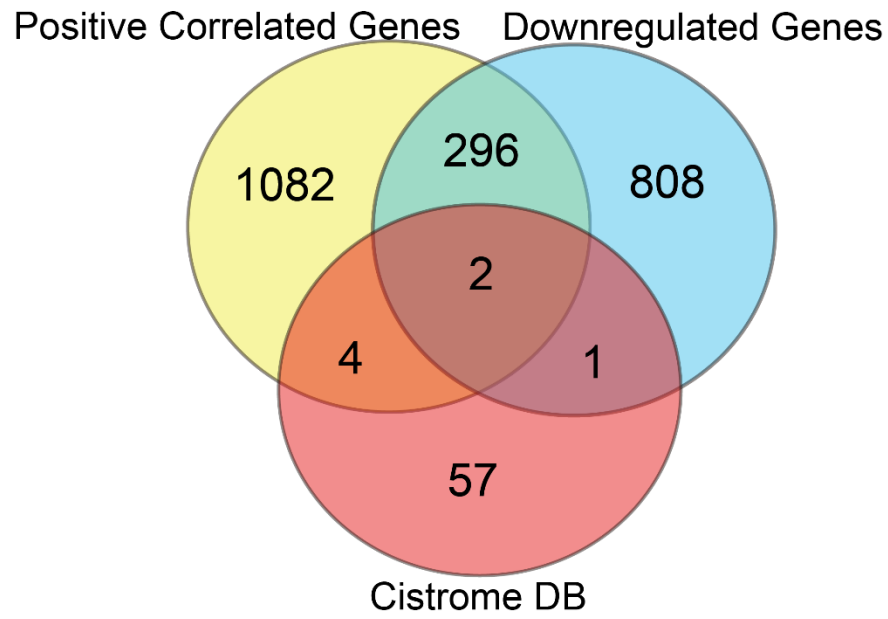

**Figure S8.** Venn diagrams for the intersection genes consists of *CCDC80* positively related CEGs, downregulated DEGs and predicted TFs from Cistrome DB
